# Supplementary material for: Clouds damp the impacts of Polar sea ice loss
Source: Copernicus journal article supplement (doi:10.5194/tc-2019-283), 2019-12-19
Supplement: Supplementary file 1 [file tc-2019-283-supplement.pdf]

# Supplement of

## Clouds damp the impacts of Polar sea ice loss

**Authors:** Ramdane Alkama<sup>1\*</sup>, Alessandro Cescatti<sup>1</sup>, Patrick C. Taylor<sup>2</sup>, Lorea Garcia-San Martin<sup>1</sup>, Herve Douville<sup>3</sup>, Gregory Duveiller<sup>1</sup>, Giovanni Forzieri<sup>1</sup> and Didier Swingedouw<sup>4</sup>

**Affiliation:**

<sup>1</sup> European Commission, Joint Research Centre, Via E. Fermi, 2749, I-21027 Ispra (VA), Italy

<sup>2</sup> NASA Langley Research Center, Hampton, Virginia

<sup>3</sup> Centre National de Recherches Meteorologiques, Meteo-France/CNRS, Toulouse, France

<sup>4</sup> EPOC, Universite Bordeaux 1, Allée Geoffroy Saint-Hilaire, Pessac 33615, France

**\*Correspondence to:** Ramdane Alkama (ram.alkama@hotmail.fr)

**1. Estimation of the part of SWcre due to albedo change and the part that is induced by the change in cloud cover/thickness**

SWcre at the surface for the year  $y_i$  (Eq. 11) and year  $y_{i+1}$  (Eq. 12) is function of surface albedo  $\alpha$ , SWdown under clear sky conditions ( $SW \downarrow_{clr}$ ) and SWdown under total sky conditions ( $SW \downarrow_{tot}$ ).

$$SWcre_{y_i} = (1 - \alpha_{y_i})(SW \downarrow_{tot,y_i} - SW \downarrow_{clr,y_i}) \quad (11)$$

$$SWcre_{y_{i+1}} = (1 - \alpha_{y_{i+1}})(SW \downarrow_{tot,y_{i+1}} - SW \downarrow_{clr,y_{i+1}}) \quad (12)$$

Using the first-order Taylor series expansion to (11) yields

$$\Delta SWcre_{y_{i+1}-y_i} = (-\Delta\alpha_{y_{i+1}-y_i})(SW \downarrow_{tot,y_i} - SW \downarrow_{clr,y_i}) + (1 - \alpha_{y_i})\Delta_{y_{i+1}-y_i}(SW \downarrow_{tot} - SW \downarrow_{clr}) \quad (13)$$

Where

$$\Delta_{y_{i+1}-y_i}(SW \downarrow_{tot} - SW \downarrow_{clr}) = (SW \downarrow_{tot,y_{i+1}} - SW \downarrow_{clr,y_{i+1}}) - (SW \downarrow_{tot,y_i} - SW \downarrow_{clr,y_i}) \quad (14)$$

Separating the terms yields,

$$\Delta SWcre_{ALB} = (-\Delta\alpha_{y_{i+1}-y_i})(SW \downarrow_{tot,y_i} - SW \downarrow_{clr,y_i}) \quad (15)$$

Where  $\Delta SWcre_{ALB}$  is the part of SWcre change that is induced by the change in surface albedo.

$$\Delta SWcre_{cloud} = (1 - \alpha_{y_i})\Delta_{y_{i+1}-y_i}(SW \downarrow_{tot} - SW \downarrow_{clr}) \quad (16)$$

Where  $\Delta SWcre_{cloud}$  is the part of SWcre change that is induced by the change in cloud cover and cloud optical.

$$\Delta SWcre_{y_{i+1}-y_i} = \Delta SWcre_{ALB} + \Delta SWcre_{cloud} \quad (17).$$

The above equations are used in figure 6 and S5.

**2. Estimation of the local variation in SW, LW and NET energy flux, and cloud cover and cloud optical depth from the changes in sea ice concentration**

To explain figure 4, 5, 6, S5 and S6 in detail, the methodology is schematized in Figure S7 and is based on the following steps. We use here SW as an example, but it can be applied in the same way to other variables.

1) For a given area, the  $\Delta SW_i$  values are summarized in a schematized plot (Figure S7a) where each cell  $i$  shows the average  $\Delta SW_i$  observed for all possible combination of sea ice concentration in the two consecutive observation years (year  $y_i$  and  $y_{i+1}$  from time period 2001-2016) reported on the X and Y axis, respectively. For the sake of clarity in Figure S7 the X and Y axes report sea ice concentration by interval of 10%, while in Figure 4, 5, 6, S5 and S6 the axes are discretized with 2% bins.

2) Because of the regular latitude/longitude grid used in the analysis, the area of the grid cells ( $a_m$ ) varies with the latitude. The energy signal ( $\Delta SW_i$ ) is therefore computed as an area weighted average (Equation 7).

$$\Delta SW_i = \frac{\sum_{m=1}^M a_m \Delta SW_m}{\sum_{m=1}^M a_m} \quad (7)$$

3) Calculation of the area weighted average ( $\Delta SW_p$ ) of the energy signal ( $\Delta SW_i$ ) of all ( $N$ ) grid cells with the same fraction  $X$  of change in sea ice concentration (shown with the same colour in Figure S7, Equations 8, 9).

$$A_i = \sum_{m=1}^M a_m \quad (8)$$

$$\Delta SW_p = \frac{\sum_{i=1}^N A_i \Delta SW_i}{\sum_{i=1}^N A_i} \quad (9)$$

The average energy signals ( $\Delta SW_p$ ) per class of sea ice concentration change are finally reported in a scatterplot (Figure 4e; Figure S7 right panel) and used to estimate a regression line with zero intercept.

The slope  $S$  of this linear regression represents the local SW energy signal generated by the complete sea ice melting of a  $1^\circ$  grid cell. The weighted root mean square error “WRMSE” of the slope is estimated by Equation 10, where  $p$  represents one of the  $NP$  points in the scatterplot (Fig. 4e; Fig. S7 right panel) and  $X_p$  is the relative change in sea ice concentration in the range  $\pm 1$  (equivalent to  $\pm 100\%$  of sea ice cover change).

$$WRMSE = \sqrt{\frac{\sum_{p=1}^{NP} A_p (\Delta SW_p - S X_p)^2}{\sum_{p=1}^{NP} A_p}}, \quad \text{where } A_p = \sum_{i=1}^N A_i \quad (10)$$

**Mean net shortwave at the surface SWsfc ( $\text{W/m}^2$ )**

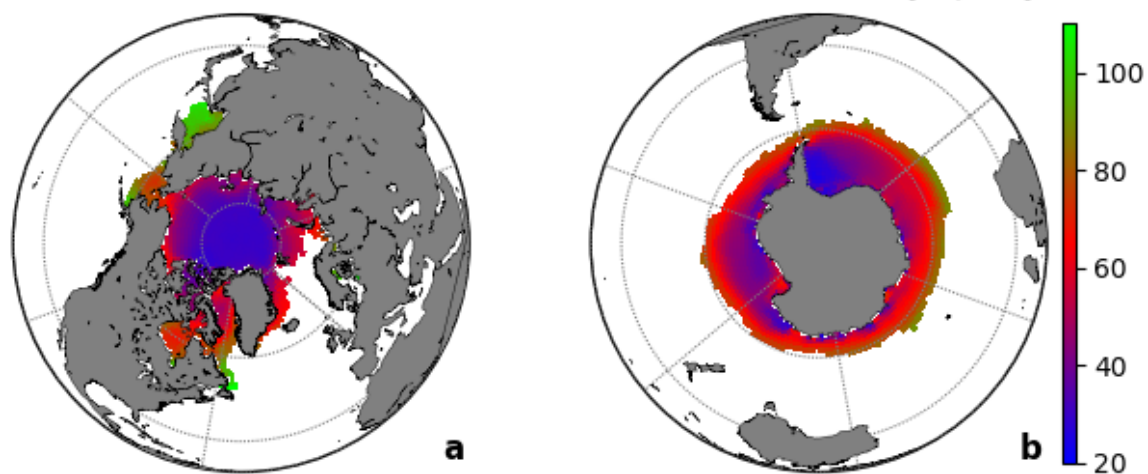

**Figure S1** Mean (over 2001-2016) net radiation at the surface (NETsrf) over polar seas based on CERES data.

**Correlation between SWsfc+LWsfc and SWcre+LWcre**

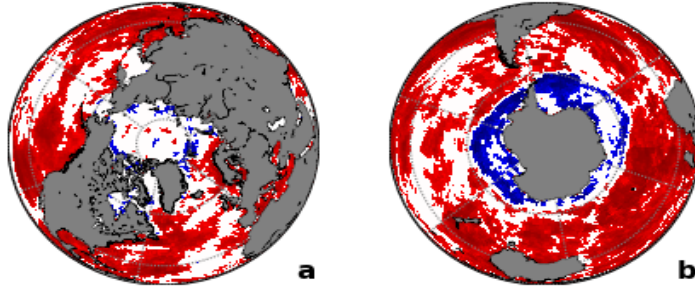

**Correlation between SWsfc+LWsfc and SWcre**

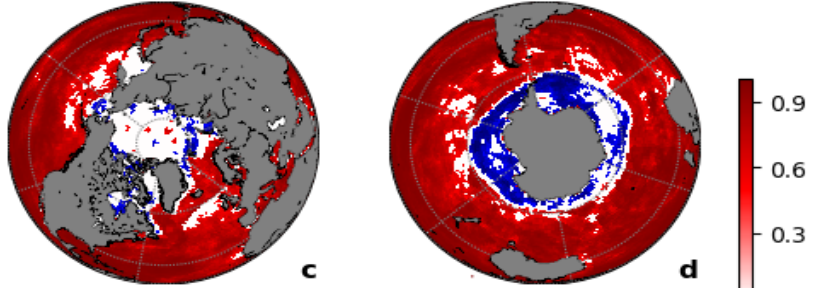

**Correlation between SWsfc and SWcre**

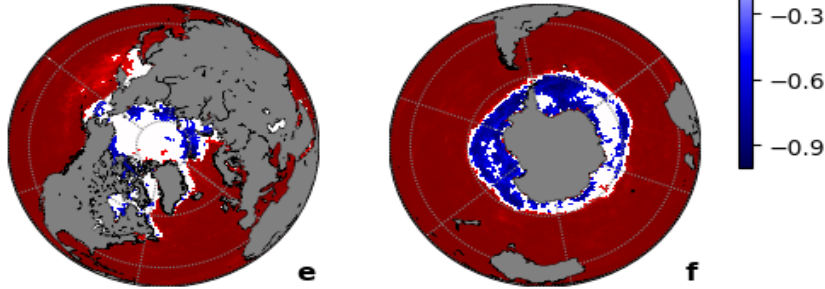

**Correlation between SWsfc+LWsfc and LWcre**

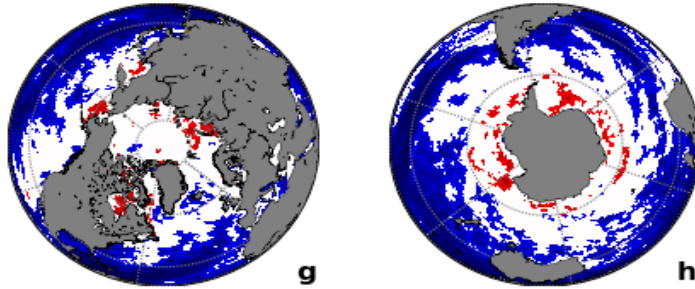

95

96 **Figure S2** Same as figure 1 but only significant correlations are shown by blue and red colors. To  
 97 test the significance of the observed correlations, we used the Pearson's correlation test of  
 98 significance at level  $\alpha = 0.05$  for  $16-2=14$  (16 years) degrees of freedom which correspond to the  
 99 use of the critical values for Pearson  $r_0=0.497$ . This means that all correlation between  $-0.497$  and  
 100  $0.497$  are not significant and set to white color.



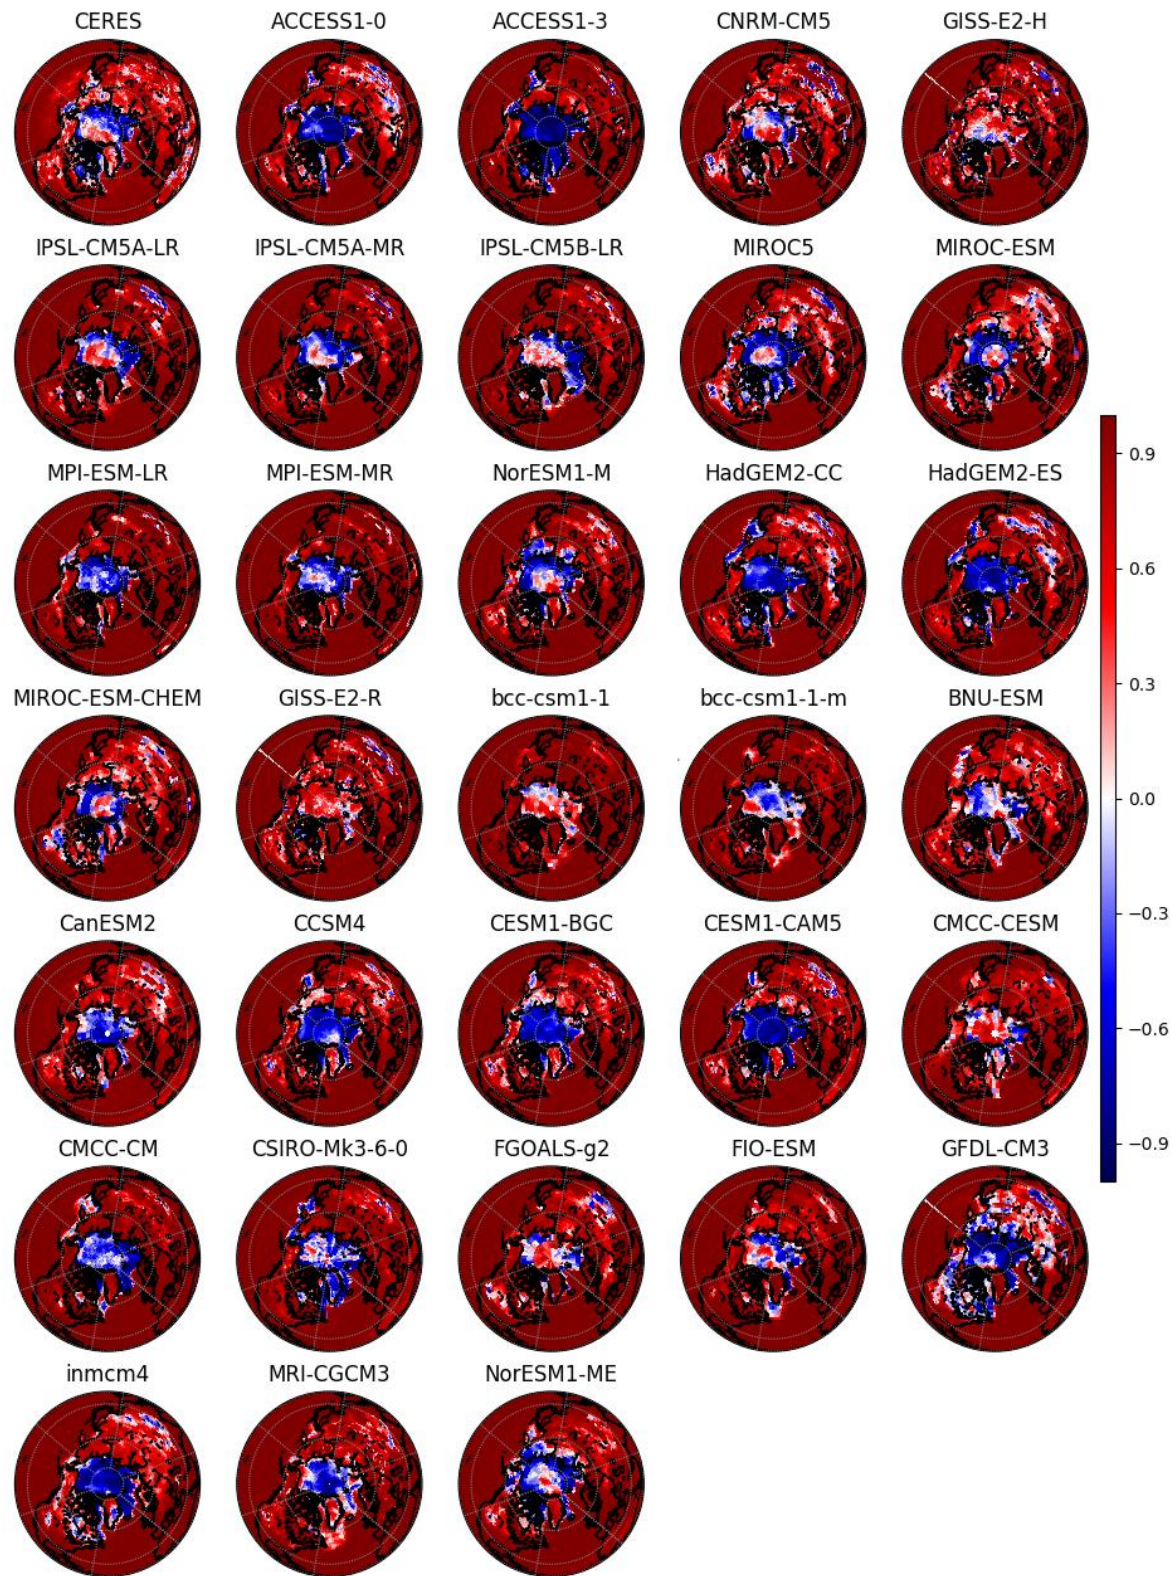

**Figure S3** Correlation between SWcre and net solar radiation at the surface SWsfc shown by 32 CMIP5 earth system models and Satellites CERES over 2001-2016 over northern hemisphere.

104  
105  
106

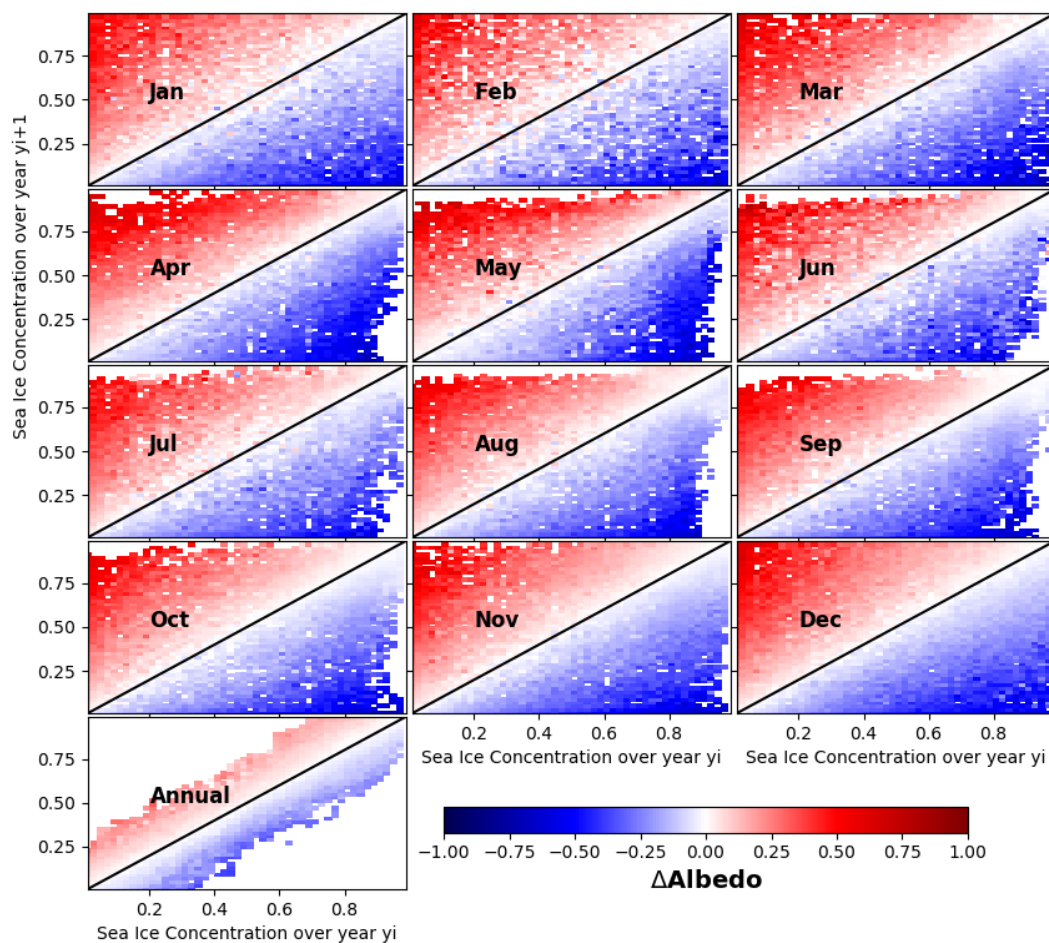

107  
108  
109  
110  
111  
112  
113  
114  
115

**Figure S4** Monthly and annual albedo change between two consecutive years  $y_{i+1}$  and  $y_i$  over **Antarctic** sea as function of sea ice concentration SIC of the year  $y_{i+1}$  and  $y_i$  from 2001-2016 time period.

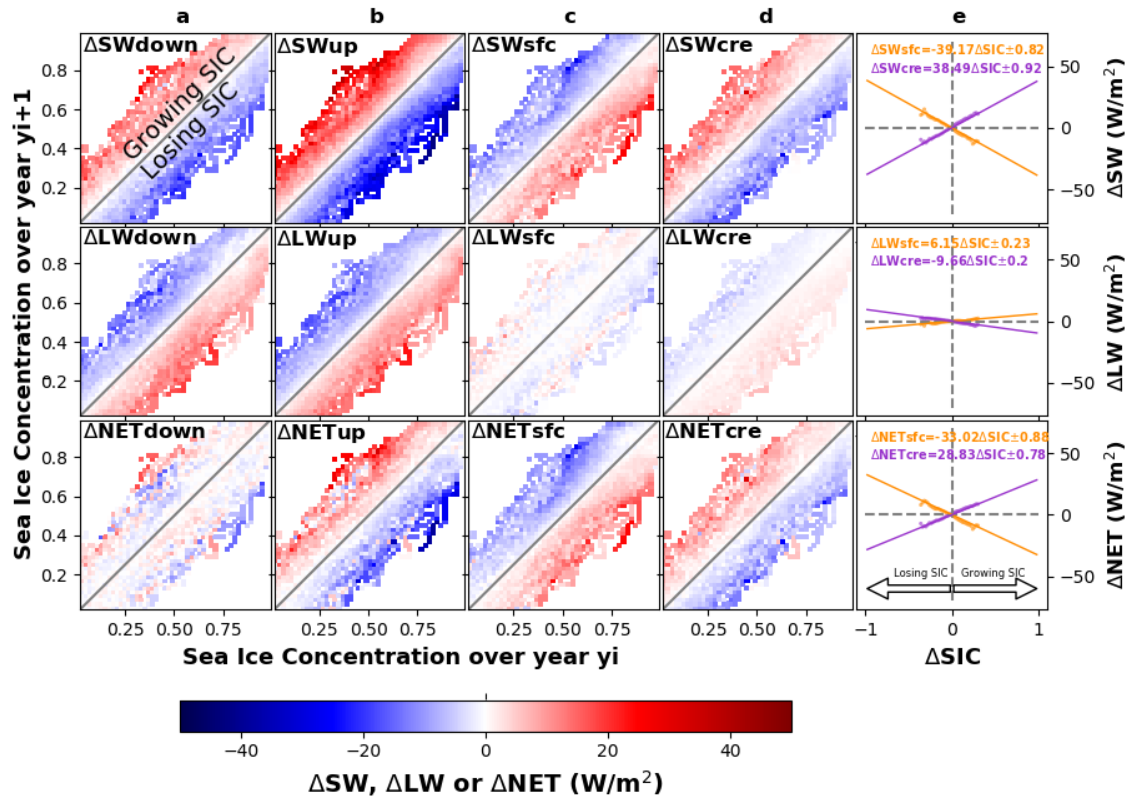

**Figure S5** Annual changes in SW, LW and NET as function of SIC. Annual changes in SW (top), LW (middle) and NET (bottom) of radiative down (a), up (b), sfc=down-up (c) and cre (d) over Arctic sea as function of SIC change between two consecutive years  $y_{i+1}$  and  $y_i$  from 2001-2016 time period. The top triangles in (c top) refers to the increase (growing) in SIC while the blue color means a reduction (cooling) in  $SW_{sfc}$ . Whereas, the top triangles in (d) refers to the increase in SIC while the red color means an increase (decreasing the cooling role of clouds) in  $SW_{cre}$ . Each dot in column (e) represent the average of one parallel to the diagonal in (c) or (d).



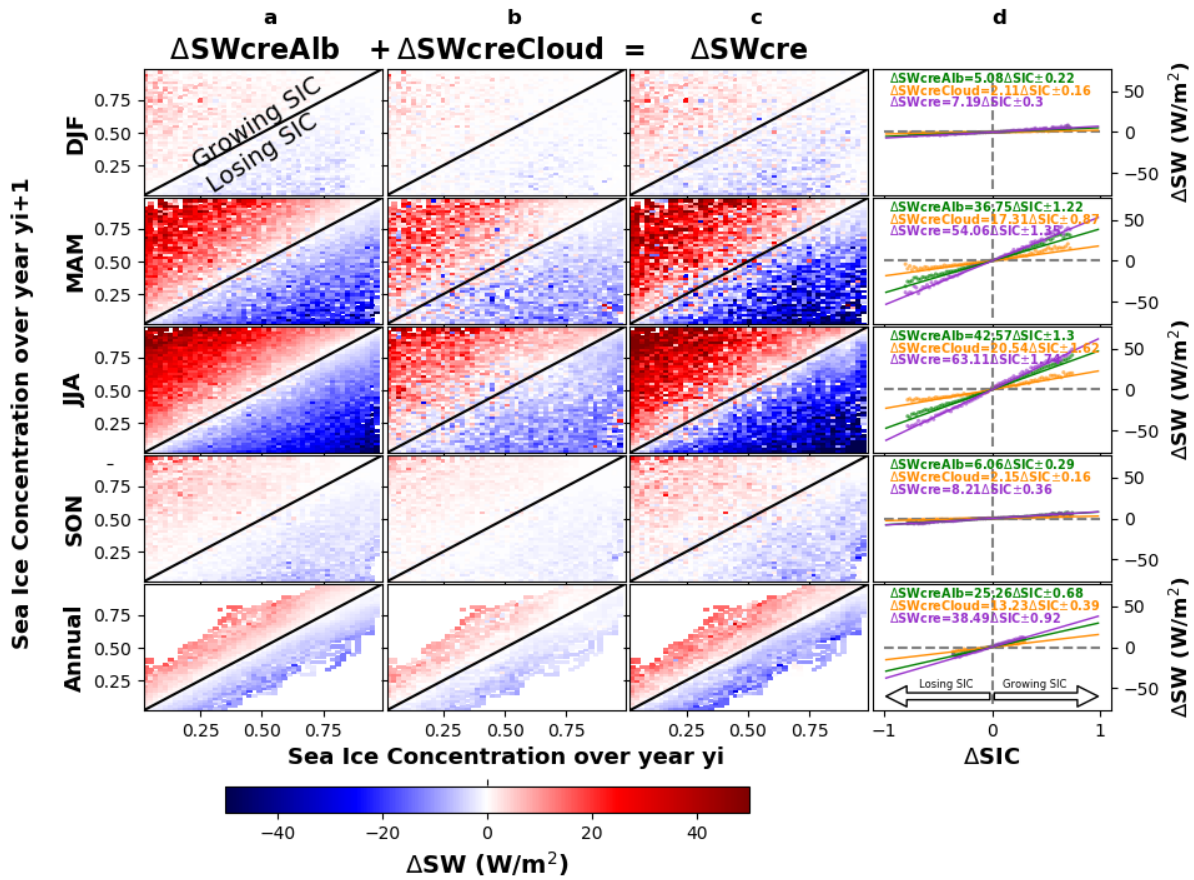

**Figure S6** Seasonal and annual changes in SWcreAlb, SWcreCloud and SWcre over Arctic sea as function of SIC change between two consecutive years  $y_{i+1}$  and  $y_i$  from 2001-2016 time period. All the analysis are based on observations from satellites data.

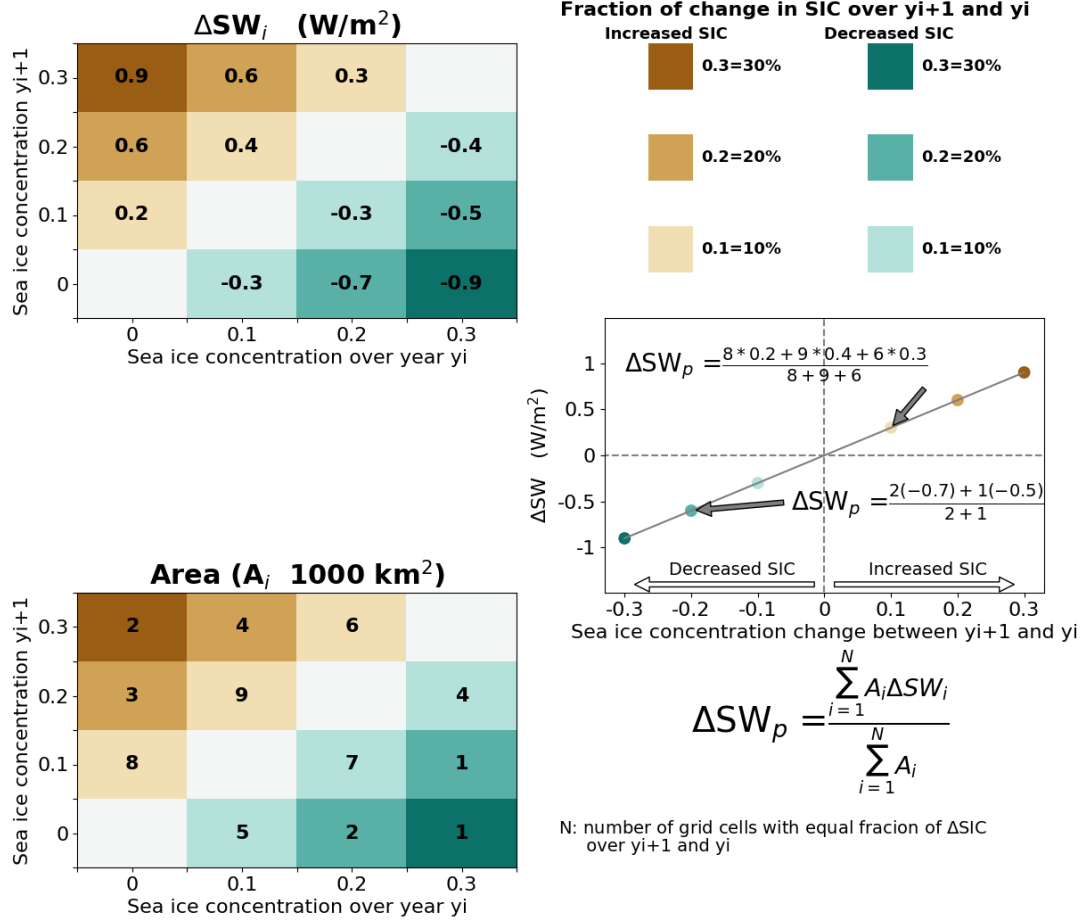

**Figure S7** Schematic representation of the methodology used to estimate the energy flux sensitivity to changes in sea ice concentration as a linear regression between the percentage of sea ice concentration and the variation in energy flux (right panel) using SW energy flux data and sea ice concentration defined in the left panels.
